# Supplementary material
Source: Research Square preprint supplement (doi:10.21203/rs.3.rs-8979230/v1)
Supplement: Supplementary file 1 [file 43beb8ab775292aaaa2baaa7.docx]

**Supplementary Table 1.** **Application effect of medical history collection thinking training supported by SP simulation teaching in the teaching of TCM Internal Medicine: Questionnaire survey.**

Dear participants:

The purpose of this questionnaire is to investigate the effectiveness and expectations of medical students' medical history collection thinking training supported by SP simulation teaching in the teaching of Traditional Chinese Medicine Internal Medicine. Please answer all questions honestly based on your personal learning knowledge and experience. This questionnaire is anonymous and confidential. By filling out this questionnaire, you agree that your answers will only be used for academic research and statistical analysis, and not for any other purposes. Thank you for your cooperation and support!

**Section I: Demographic Information**

**Question 1**: What is your gender?

A: Male

B: Female

**Question 2**: How old are you?

A: 18

B: 19

D: 20

E: 21

F: 22
 G: 23

**Section** **II: Clinical Professional Competence in TCM**

**Question 3**: Does it help to improve the ability to comprehensively obtain medical history?

A: Agree

B: Disagree

C: Uncertain

**Question 4**: Does it help to deepen the diagnostic ability of TCM internal medicine diseases?

A: Agree

B: Disagree

C: Uncertain

**Question 5**: Does it help to improve the ability of TCM internal medicine disease differentiation and diagnosis?

A: Agree

B: Disagree

C: Uncertain

**Question 6**: Does it help to promote the ability of TCM to differentiate diseases and syndromes?

A: Agree

B: Disagree

C: Uncertain

**Question 7**: Does it help to improve the four diagnostic abilities of TCM?

A: Agree

B: Disagree

C: Uncertain

**Section** **III: TCM Thinking and Comprehensive Ability**

**Question 8**: Does it help to improve clinical comprehensive ability?

A: Agree

B: Disagree

C: Uncertain

**Question 9**: Does it help train clinical thinking in TCM?

A: Agree

B: Disagree

C: Uncertain

**Question 10**: Does it help to increase the ability to apply what has been learned?

A: Agree

B: Disagree

C: Uncertain

**Question 11**: Does it help to integrate and connect learned knowledge?

A: Agree

B: Disagree

C: Uncertain

**Section Ⅳ: Learning Ability**

**Question 12**: Does it help to enhance learning interest？

A: Agree

B: Disagree

C: Uncertain

**Question 13**: Does it help to improve learning motivation and initiative？

A: Agree

B: Disagree

C: Uncertain

**Question 14**: Does it help improve self-directed learning ability？

A: Agree

B: Disagree

C: Uncertain

**Section Ⅴ: Humanistic Literacy and Communication and Collaboration Skills**

**Question 15**: Does it help to enhance medical humanities literacy and improve humanistic care capabilities？

A: Agree

B: Disagree

C: Uncertain

**Question 16**: Does it help improve doctor-patient communication skills？

A: Agree

B: Disagree

C: Uncertain

**Question 17**: Does it help cultivate team collaboration awareness？

A: Agree

B: Disagree

C: Uncertain

**Section Ⅵ: Satisfaction with Teaching Methods**

**Question 18**: Do you wish to continue using this teaching method？

A: Agree

B: Disagree

C: Uncertain
